# Supplementary material
Source: publisher figshare collection journal article supplement (https://gsapubs.figshare.com/articles/dataset/_/24088302)
Supplement: Supplementary file 1 [file 1]

## Sheet: Sheet1
Depth (m)	δ13Ccarb	Core/Quarry Name
1570.63	3.07474	Bradley #4
1571.55	1.60844	Bradley #4
1572.77	1.56286	Bradley #4
1573.68	1.23691	Bradley #4
1574.6	1.09127	Bradley #4
1575.51	0.892131	Bradley #4
1576.12	0.825752	Bradley #4
1577.04	0.835659	Bradley #4
1577.95	0.799002	Bradley #4
1578.86	0.680112	Bradley #4
1581.91	0.680112	Bradley #4
1582.83	0.681103	Bradley #4
1583.74	0.866372	Bradley #4
1584.66	0.834668	Bradley #4
1585.57	0.751446	Bradley #4
1586.48	0.842594	Bradley #4
1587.4	0.973372	Bradley #4
1588.31	1.22898	Bradley #4
1589.23	1.62825	Bradley #4
1590.14	2.53181	Bradley #4
1591.06	3.59191	Bradley #4
1591.97	3.62163	Bradley #4
1592.88	4.62228	Bradley #4
1593.8	4.59949	Bradley #4
1594.71	4.9522	Bradley #4
1595.63	4.93635	Bradley #4
1596.54	3.96244	Bradley #4
1597.46	3.14904	Bradley #4
1597.76	2.63616	Bradley #4
1598.07	2.48591	Bradley #4
1598.37	2.06418	Bradley #4
1598.52	2.63319	Bradley #4
1598.68	2.50732	Bradley #4
1598.98	2.46417	Bradley #4
1599.29	2.42877	Bradley #4
1599.59	2.26252	Bradley #4
1599.9	2.20663	Bradley #4
1600.05	2.93467	Bradley #4
1600.2	2.9608	Bradley #4
1600.5	2.65667	Bradley #4
1600.66	2.73574	Bradley #4
1600.81	2.56842	Bradley #4
1601.11	2.4684	Bradley #4
1601.42	2.64411	Bradley #4
1602.03	2.03743	Bradley #4
1602.64	2.31645	Bradley #4
1602.94	2.07211	Bradley #4
1603.25	2.17696	Bradley #4
1603.55	2.47369	Bradley #4
1603.71	2.62618	Bradley #4
1603.86	3.05294	Bradley #4
1604.01	3.47572	Bradley #4
1604.16	2.89604	Bradley #4
1604.47	2.60527	Bradley #4
1604.77	2.36933	Bradley #4
1605.08	2.40708	Bradley #4
1605.69	1.93538	Bradley #4
1606.6	1.85612	Bradley #4
1607.52	1.71247	Bradley #4
1608.12	1.58349	Bradley #4
1608.43	1.28149	Bradley #4
1608.73	1.2373	Bradley #4
1609.04	1.13641	Bradley #4
1609.12	1.21693	Bradley #4
1609.27	2.79848	Bradley #4
1609.34	3.02025	Bradley #4
1609.65	2.90099	Bradley #4
1609.95	2.83932	Bradley #4
1610.26	2.33664	Bradley #4
1610.56	1.60435	Bradley #4
1610.87	1.24581	Bradley #4
1611.17	1.53116	Bradley #4
1611.48	1.19501	Bradley #4
1612.09	1.02885	Bradley #4
1613	1.26316	Bradley #4
1613.92	0.822779	Bradley #4
1614.83	1.0883	Bradley #4
1615.74	1.17251	Bradley #4
1616.05	1.31742	Bradley #4
1616.35	1.17499	Bradley #4
1616.66	1.3738	Bradley #4
1616.96	1.67943	Bradley #4
1617.27	1.60547	Bradley #4
1617.57	2.12157	Bradley #4
1617.88	1.6003	Bradley #4
1618.18	1.11703	Bradley #4
1618.49	1.69823	Bradley #4
1618.87	1.48952	Bradley #4
1619.1	1.62429	Bradley #4
1619.4	1.12454	Bradley #4
1620.01	0.928789	Bradley #4
1620.93	0.728659	Bradley #4
1621.84	0.723705	Bradley #4
1622.76	0.868354	Bradley #4
1623.67	0.732622	Bradley #4
1624.58	0.865381	Bradley #4
1625.19	0.867363	Bradley #4
1625.5	0.921774	Bradley #4
1625.8	0.765494	Bradley #4
1626.11	0.453232	Bradley #4
1626.41	0.956393	Bradley #4
1626.72	0.212581	Bradley #4
1627.02	0.204556	Bradley #4
1627.33	0.909905	Bradley #4
1627.63	0.985077	Bradley #4
1627.94	1.0348	Bradley #4
1628.85	1.14477	Bradley #4
1629.77	1.24583	Bradley #4
1630.68	1.29239	Bradley #4
1630.98	0.842645	Bradley #4
1631.29	1.57459	Bradley #4
1631.59	1.72436	Bradley #4
1631.9	1.70416	Bradley #4
1632.2	1.62602	Bradley #4
1632.51	1.41723	Bradley #4
1633.42	1.45884	Bradley #4
1633.88	1.16114	Bradley #4
1634.34	1.38156	Bradley #4
1634.95	1.3006	Bradley #4
1635.25	0.90303	Bradley #4
1635.56	0.404469	Bradley #4
1635.86	0.277863	Bradley #4
1636.17	-0.21651	Bradley #4
1636.47	0.0216829	Bradley #4
1636.78	-0.0208488	Bradley #4
1637.08	-0.0956395	Bradley #4
1638	0.049009	Bradley #4
1638.91	0.45026	Bradley #4
1641.96	0.440077	Bradley #4
1642.87	0.466783	Bradley #4
1643.48	0.574596	Bradley #4
1644.09	0.523162	Bradley #4
1644.7	0.245222	Bradley #4
1645.31	0.256102	Bradley #4
1645.92	0.270939	Bradley #4
1646.53	0.274895	Bradley #4
1647.14	0.100812	Bradley #4
1647.75	0.0117918	Bradley #4
1648.36	0.0157483	Bradley #4
1648.97	0.0325632	Bradley #4
1649.58	-0.223617	Bradley #4
1650.19	-0.256257	Bradley #4
1650.8	-0.365059	Bradley #4
1651.41	-0.339343	Bradley #4
1652.02	-0.47584	Bradley #4
1652.63	-0.298789	Bradley #4
1653.24	-0.538154	Bradley #4
1653.84	-0.429352	Bradley #4
1654.45	-0.570795	Bradley #4
1655.06	-0.730041	Bradley #4
1655.67	-0.989189	Bradley #4
1192.53	1.17808	Schiller #1-10
1192.23	1.13725	Schiller #1-10
1191.92	1.21991	Schiller #1-10
1191.62	1.21792	Schiller #1-10
1191.31	1.27071	Schiller #1-10
1191.01	1.26473	Schiller #1-10
1190.7	1.16016	Schiller #1-10
1190.4	1.33046	Schiller #1-10
1190.09	1.27469	Schiller #1-10
1189.79	1.19501	Schiller #1-10
1189.48	1.26672	Schiller #1-10
1189.18	1.22489	Schiller #1-10
1188.87	1.34042	Schiller #1-10
1188.57	1.21195	Schiller #1-10
1188.26	1.06156	Schiller #1-10
1187.96	1.13127	Schiller #1-10
1187.65	1.13327	Schiller #1-10
1187.35	1.28764	Schiller #1-10
1187.04	1.23087	Schiller #1-10
1186.74	1.1741	Schiller #1-10
1186.43	1.00479	Schiller #1-10
1186.13	0.969932	Schiller #1-10
1185.82	0.858386	Schiller #1-10
1185.52	0.755804	Schiller #1-10
1185.21	0.86237	Schiller #1-10
1184.91	0.877309	Schiller #1-10
1184.61	0.835479	Schiller #1-10
1184.3	0.791658	Schiller #1-10
1183.23	0.823528	Schiller #1-10
1182.93	0.777715	Schiller #1-10
1182.62	0.383321	Schiller #1-10
1182.32	0.908183	Schiller #1-10
1182.01	0.969932	Schiller #1-10
1181.71	0.893244	Schiller #1-10
1181.4	0.988855	Schiller #1-10
1181.1	1.08048	Schiller #1-10
1180.8	1.09542	Schiller #1-10
1180.49	1.02371	Schiller #1-10
1180.19	1.07251	Schiller #1-10
1179.88	1.06455	Schiller #1-10
1179.58	1.07849	Schiller #1-10
1179.27	1.13127	Schiller #1-10
1178.97	1.11036	Schiller #1-10
1178.66	1.13526	Schiller #1-10
1178.36	1.0516	Schiller #1-10
1178.05	1.04264	Schiller #1-10
1177.75	0.725926	Schiller #1-10
1177.44	1.05558	Schiller #1-10
1177.14	1.11833	Schiller #1-10
1176.83	1.29361	Schiller #1-10
1176.53	1.53264	Schiller #1-10
1176.22	1.75175	Schiller #1-10
1175.92	1.68801	Schiller #1-10
1175.61	1.77167	Schiller #1-10
1175.31	1.71689	Schiller #1-10
1175	1.48782	Schiller #1-10
1174.7	1.86927	Schiller #1-10
1174.42	1.72187	Schiller #1-10
1268.27	1.32434	Islay Unit #1-22
1268.88	1.30357	Islay Unit #1-22
1269.49	1.30654	Islay Unit #1-22
1270.1	1.26895	Islay Unit #1-22
1270.71	1.22939	Islay Unit #1-22
1271.32	1.47963	Islay Unit #1-22
1271.93	1.56766	Islay Unit #1-22
1272.54	1.58646	Islay Unit #1-22
1273.15	1.57755	Islay Unit #1-22
1273.76	1.59239	Islay Unit #1-22
1274.37	1.08399	Islay Unit #1-22
1274.98	0.242255	Islay Unit #1-22
1275.59	0.511293	Islay Unit #1-22
1276.2	0.421284	Islay Unit #1-22
1276.81	0.305558	Islay Unit #1-22
1277.42	0.235331	Islay Unit #1-22
1278.03	0.103779	Islay Unit #1-22
1278.64	-0.237464	Islay Unit #1-22
1279.25	-0.205813	Islay Unit #1-22
1279.86	-0.341321	Islay Unit #1-22
1280.46	-0.462981	Islay Unit #1-22
1281.07	-0.435286	Islay Unit #1-22
1281.38	-0.406602	Islay Unit #1-22
1281.99	-1.29779	Islay Unit #1-22
1282.6	-0.683553	Islay Unit #1-22
1283.21	-0.755758	Islay Unit #1-22
1283.82	-0.697401	Islay Unit #1-22
1284.43	-0.239442	Islay Unit #1-22
1285.04	1.32236	Islay Unit #1-22
1285.65	1.47568	Islay Unit #1-22
1286.26	1.27884	Islay Unit #1-22
2501.49	1.79219	Wark #1-30
2501.65	1.71072	Wark #1-30
2502.1	1.78428	Wark #1-30
2502.46	1.79524	Wark #1-30
2502.47	1.78729	Wark #1-30
2502.56	1.69571	Wark #1-30
2502.71	1.77241	Wark #1-30
2503.02	1.79081	Wark #1-30
2503.32	1.83967	Wark #1-30
2503.47	1.70171	Wark #1-30
2503.93	1.72493	Wark #1-30
2504.34	1.86082	Wark #1-30
2504.35	1.66905	Wark #1-30
2504.39	1.66968	Wark #1-30
2504.54	1.5103	Wark #1-30
2504.85	1.02599	Wark #1-30
2505.15	-0.206802	Wark #1-30
2469.95	1.29266	Johnson #1-6
2470.1	1.10144	Johnson #1-6
2470.4	1.0954	Johnson #1-6
2470.71	0.973623	Johnson #1-6
2471.01	0.990732	Johnson #1-6
2471.32	1.19302	Johnson #1-6
2471.62	2.40273	Johnson #1-6
2471.93	2.99954	Johnson #1-6
2472.23	2.94922	Johnson #1-6
2472.54	2.22963	Johnson #1-6
2472.84	1.49696	Johnson #1-6
2473.15	1.42047	Johnson #1-6
2473.45	1.18296	Johnson #1-6
2473.76	0.921289	Johnson #1-6
2474.06	1.04005	Johnson #1-6
2474.37	1.18094	Johnson #1-6
2474.67	1.28863	Johnson #1-6
2474.98	1.00985	Johnson #1-6
2475.28	0.934372	Johnson #1-6
2475.59	1.0018	Johnson #1-6
2475.89	0.806558	Johnson #1-6
2476.2	0.99677	Johnson #1-6
2476.5	1.23328	Johnson #1-6
2476.8	1.19604	Johnson #1-6
2477.11	1.35707	Johnson #1-6
2477.41	1.29467	Johnson #1-6
2477.72	1.10848	Johnson #1-6
2478.02	1.29266	Johnson #1-6
2478.33	1.2997	Johnson #1-6
2478.63	0.946449	Johnson #1-6
2478.94	0.788442	Johnson #1-6
2479.24	1.21013	Johnson #1-6
2479.55	1.31379	Johnson #1-6
2479.85	1.5825	Johnson #1-6
2480.16	1.32989	Johnson #1-6
2480.46	0.534826	Johnson #1-6
2480.77	1.04206	Johnson #1-6
2481.07	1.3621	Johnson #1-6
2481.47	1.15377	Johnson #1-6
2481.68	1.70126	Johnson #1-6
2481.99	1.55835	Johnson #1-6
2482.29	1.5976	Johnson #1-6
2482.6	1.12962	Johnson #1-6
2482.9	0.878013	Johnson #1-6
2483.21	1.30171	Johnson #1-6
2483.51	1.13867	Johnson #1-6
2483.82	1.33191	Johnson #1-6
2484.12	1.38424	Johnson #1-6
2484.42	1.19503	Johnson #1-6
2484.73	1.27253	Johnson #1-6
2485.03	1.49998	Johnson #1-6
2485.34	1.07326	Johnson #1-6
2485.64	2.26385	Johnson #1-6
2485.95	1.59659	Johnson #1-6
2486.25	1.5976	Johnson #1-6
2486.56	2.01224	Johnson #1-6
2486.86	1.87638	Johnson #1-6
2487.17	2.0837	Johnson #1-6
2487.47	1.62779	Johnson #1-6
2487.78	1.21516	Johnson #1-6
2488.08	1.51234	Johnson #1-6
2488.39	1.7395	Johnson #1-6
2488.69	1.41242	Johnson #1-6
2489	1.58854	Johnson #1-6
2489.3	1.42953	Johnson #1-6
2489.61	1.3782	Johnson #1-6
2489.91	1.38625	Johnson #1-6
2490.22	1.41846	Johnson #1-6
2490.52	1.35103	Johnson #1-6
2490.83	1.77473	Johnson #1-6
2491.13	1.9579	Johnson #1-6
2491.44	1.28058	Johnson #1-6
2491.74	2.09376	Johnson #1-6
2492.04	1.33191	Johnson #1-6
2492.35	1.41645	Johnson #1-6
2492.65	1.63081	Johnson #1-6
2492.96	1.87034	Johnson #1-6
2493.26	1.57647	Johnson #1-6
2493.57	1.61672	Johnson #1-6
2493.87	1.58955	Johnson #1-6
2494.18	1.3782	Johnson #1-6
2494.48	1.83511	Johnson #1-6
2494.79	1.58552	Johnson #1-6
2495.09	1.47884	Johnson #1-6
2495.4	1.5815	Johnson #1-6
2495.7	1.76165	Johnson #1-6
2496.01	1.62377	Johnson #1-6
2496.31	2.19742	Johnson #1-6
2496.62	1.79184	Johnson #1-6
2496.92	1.89651	Johnson #1-6
2497.23	2.10282	Johnson #1-6
1430.43	0.90127	Sheldon St. #1-34
1431.04	1.46706	Sheldon St. #1-34
1432.1	1.45212	Sheldon St. #1-34
1432.71	1.02477	Sheldon St. #1-34
1433.78	1.73675	Sheldon St. #1-34
1434.69	1.53205	Sheldon St. #1-34
1435.3	1.76641	Sheldon St. #1-34
1436.22	1.78322	Sheldon St. #1-34
1437.13	1.69522	Sheldon St. #1-34
1438.05	1.82575	Sheldon St. #1-34
1439.04	1.63292	Sheldon St. #1-34
1439.88	1.83366	Sheldon St. #1-34
1440.79	1.49645	Sheldon St. #1-34
1441.86	0.0734791	Sheldon St. #1-34
1442.77	0.677675	Sheldon St. #1-34
1443.53	0.296962	Sheldon St. #1-34
1444.45	0.325639	Sheldon St. #1-34
1445.36	0.059635	Sheldon St. #1-34
1446.28	-0.3013	Sheldon St. #1-34
1447.19	0.554067	Sheldon St. #1-34
1448.1	0.281688	Sheldon St. #1-34
1449.02	-0.289086	Sheldon St. #1-34
1449.93	-1.13777	Sheldon St. #1-34
1450.85	-0.331918	Sheldon St. #1-34
1451.76	-2.18768	Sheldon St. #1-34
1452.22	-2.52337	Sheldon St. #1-34
1453.29	-1.45553	Sheldon St. #1-34
1454.2	-2.47157	Sheldon St. #1-34
1454.73	-2.59808	Sheldon St. #1-34
1456.18	-2.34805	Sheldon St. #1-34
1457.31	-2.53931	Sheldon St. #1-34
1458.56	-2.24645	Sheldon St. #1-34
1459.38	-1.26129	Sheldon St. #1-34
1460.14	-2.06814	Sheldon St. #1-34
1461.21	-0.291078	Sheldon St. #1-34
1462.13	-0.207404	Sheldon St. #1-34
1463.04	-0.24426	Sheldon St. #1-34
1463.34	-1.02521	Sheldon St. #1-34
1464.87	-0.471374	Sheldon St. #1-34
1465.78	-0.301039	Sheldon St. #1-34
1466.62	-0.525165	Sheldon St. #1-34
1467.31	-0.684543	Sheldon St. #1-34
1468.22	1.08954	Sheldon St. #1-34
1469.14	1.59755	Sheldon St. #1-34
1470.05	1.82766	Sheldon St. #1-34
1470.96	2.06872	Sheldon St. #1-34
1471.88	2.42532	Sheldon St. #1-34
1472.79	2.27391	Sheldon St. #1-34
1473.71	2.20718	Sheldon St. #1-34
1474.62	2.22809	Sheldon St. #1-34
1475.54	1.63043	Sheldon St. #1-34
1476.45	1.51488	Sheldon St. #1-34
1477.37	1.94321	Sheldon St. #1-34
1478.28	1.54874	Sheldon St. #1-34
1479.19	2.05178	Sheldon St. #1-34
1480.11	1.12739	Sheldon St. #1-34
1481.02	0.880352	Sheldon St. #1-34
1481.94	1.22102	Sheldon St. #1-34
1482.85	0.813612	Sheldon St. #1-34
1483.77	1.26884	Sheldon St. #1-34
1484.68	1.20508	Sheldon St. #1-34
1290.52	0.88221	Ford Scheuner #1-7
1291.44	0.955404	Ford Scheuner #1-7
1292.35	1.38567	Ford Scheuner #1-7
1293.27	2.02958	Ford Scheuner #1-7
1293.88	1.72988	Ford Scheuner #1-7
1294.49	1.76153	Ford Scheuner #1-7
1295.1	1.76153	Ford Scheuner #1-7
1295.7	1.49645	Ford Scheuner #1-7
1296.31	1.34017	Ford Scheuner #1-7
1297.08	1.49249	Ford Scheuner #1-7
1297.99	1.50238	Ford Scheuner #1-7
1698.8	1.51432	Snowplow #1-5
1699.56	1.11505	Snowplow #1-5
1700.48	1.22304	Snowplow #1-5
1701.39	1.06452	Snowplow #1-5
1702.31	1.72337	Snowplow #1-5
1703.22	1.86603	Snowplow #1-5
1704.14	1.86801	Snowplow #1-5
1705.05	0.918882	Snowplow #1-5
1705.97	0.867363	Snowplow #1-5
1708.71	1.26115	Snowplow #1-5
1709.62	1.10164	Snowplow #1-5
1710.54	1.19675	Snowplow #1-5
1711.45	1.80408	Snowplow #1-5
1712.37	0.831168	Snowplow #1-5
1713.28	0.964919	Snowplow #1-5
1714.2	1.06201	Snowplow #1-5
1716.63	1.78624	Snowplow #1-5
1716.94	1.85461	Snowplow #1-5
1717.97	1.97647	Snowplow #1-5
1718.46	1.41967	Snowplow #1-5
1719.38	1.43948	Snowplow #1-5
1720.55	1.09074	Snowplow #1-5
1722.2	1.30375	Snowplow #1-5
1723.03	1.91603	Snowplow #1-5
1723.95	2.0478	Snowplow #1-5
1724.86	0.883446	Snowplow #1-5
1725.78	1.74463	Snowplow #1-5
1726.69	1.85461	Snowplow #1-5
1727.61	2.01511	Snowplow #1-5
1728.52	1.53063	Snowplow #1-5
1729.44	0.946094	Snowplow #1-5
1730.35	1.26214	Snowplow #1-5
1731.26	1.80903	Snowplow #1-5
1732.18	1.42958	Snowplow #1-5
1733.09	0.525029	Snowplow #1-5
1734.01	0.955011	Snowplow #1-5
1734.92	1.35778	Snowplow #1-5
1735.84	1.29682	Snowplow #1-5
1736.75	1.37707	Snowplow #1-5
1737.66	1.36914	Snowplow #1-5
1738.58	1.52271	Snowplow #1-5
1739.49	1.42462	Snowplow #1-5
1740.33	0.614217	Snowplow #1-5
1741.32	1.0739	Snowplow #1-5
1742.24	1.10461	Snowplow #1-5
1743.15	1.04616	Snowplow #1-5
1744.07	1.05012	Snowplow #1-5
1744.98	1.12641	Snowplow #1-5
1745.89	0.852853	Snowplow #1-5
1746.81	0.787436	Snowplow #1-5
1747.72	0.792468	Snowplow #1-5
1748.64	1.62175	Snowplow #1-5
1749.55	1.46073	Snowplow #1-5
1750.47	1.18195	Snowplow #1-5
1751.38	1.25944	Snowplow #1-5
1685.54	1.01	Snowplow #4-6
1686.76	-0.27	Snowplow #4-6
1687.68	0.4	Snowplow #4-6
1688.59	0.44	Snowplow #4-6
1689.51	0.42	Snowplow #4-6
1690.42	-0.53	Snowplow #4-6
1691.03	-0.7	Snowplow #4-6
1691.64	-0.45	Snowplow #4-6
1692.55	1.96	Snowplow #4-6
1693.47	2.57	Snowplow #4-6
1694.38	3.02	Snowplow #4-6
1695.3	3.2	Snowplow #4-6
1696.21	4.12	Snowplow #4-6
1697.13	3.3	Snowplow #4-6
1698.04	3.47	Snowplow #4-6
1698.96	3.76	Snowplow #4-6
1699.87	3.59	Snowplow #4-6
1700.78	4.02	Snowplow #4-6
1701.7	3.07	Snowplow #4-6
1702.61	1.8	Snowplow #4-6
1703.53	1.51	Snowplow #4-6
-1	0.422931	Scott Quarry
-2	0.147503	Scott Quarry
-3	0.839089	Scott Quarry
-4	1.23514	Scott Quarry
-5	0.996907	Scott Quarry
-6	1.0723	Scott Quarry
-7	0.754651	Scott Quarry
-8	2.20417	Scott Quarry
-9	1.37085	Scott Quarry
-10	0.82401	Scott Quarry
-11	0.662171	Scott Quarry
-12	0.943631	Scott Quarry
-14	0.346535	Scott Quarry
-15	0.680265	Scott Quarry
-16	0.952678	Scott Quarry
-17	0.835068	Scott Quarry
-18	0.719468	Scott Quarry
-19	0.9185	Scott Quarry
-20	1.19594	Scott Quarry
-21	1.69855	Scott Quarry
-22	1.35476	Scott Quarry
-14.0208	0.678664	Sawheidle Quarry
-13.716	0.65592	Sawheidle Quarry
-13.5636	0.503635	Sawheidle Quarry
-13.1064	0.127867	Sawheidle Quarry
-12.192	0.824027	Sawheidle Quarry
-11.2776	0.857648	Sawheidle Quarry
-10.0584	0.735915	Sawheidle Quarry
-9.144	0.311795	Sawheidle Quarry
-8.2296	-0.14963	Sawheidle Quarry
-7.3152	-0.315981	Sawheidle Quarry
-6.4008	0.161158	Sawheidle Quarry
-5.4864	0.298621	Sawheidle Quarry
-4.08432	0.016125	Sawheidle Quarry
-3.16992	-0.0145298	Sawheidle Quarry
-2.25552	0.00722522	Sawheidle Quarry
-1.34112	-0.207358	Sawheidle Quarry
-0.73152	-0.311189	Sawheidle Quarry
0	-0.128711	Sawheidle Quarry
1.85928	3.68314	Cedarville core
2.46888	3.71097	Cedarville core
3.3528	3.71295	Cedarville core
4.51104	3.68612	Cedarville core
5.42544	3.59868	Cedarville core
6.30936	3.38704	Cedarville core
7.3152	3.56788	Cedarville core
8.2296	3.54006	Cedarville core
9.35736	3.5182	Cedarville core
10.3632	3.52019	Cedarville core
11.2776	3.1277	Cedarville core
12.192	2.72429	Cedarville core
13.1064	2.48283	Cedarville core
14.3256	2.35167	Cedarville core
15.4534	1.93236	Cedarville core
16.3373	1.86479	Cedarville core
17.3736	1.87871	Cedarville core
18.5014	1.84691	Cedarville core
19.3243	1.74556	Cedarville core
20.4216	1.21794	Cedarville core
21.5494	1.44846	Cedarville core
22.3114	1.61042	Cedarville core
23.1648	1.49019	Cedarville core
24.2011	1.5518	Cedarville core
25.146	1.89262	Cedarville core
26.0604	2.06253	Cedarville core
26.8834	2.30199	Cedarville core
28.0721	2.6915	Cedarville core
28.9865	2.89022	Cedarville core
29.5961	2.96673	Cedarville core
30.6934	3.07206	Cedarville core
31.6992	3.07901	Cedarville core
32.827	3.11479	Cedarville core
33.9242	3.081	Cedarville core
34.8082	3.17937	Cedarville core
35.7226	2.84253	Cedarville core
36.7894	3.2529	Cedarville core
37.6733	3.24396	Cedarville core
38.4353	1.87871	Cedarville core
39.8374	3.33935	Cedarville core
40.5994	3.40989	Cedarville core
41.4833	3.36816	Cedarville core
42.3977	3.34233	Cedarville core
42.7634	3.30159	Cedarville core
43.373	3.33835	Cedarville core
44.2874	3.42579	Cedarville core
45.9334	3.21683	Cedarville core
46.6649	3.42977	Cedarville core
47.7622	3.43772	Cedarville core
48.9814	3.24694	Cedarville core
50.2006	2.87216	Cedarville core
51.1454	3.21514	Cedarville core
52.0294	2.84037	Cedarville core
52.8828	3.00847	Cedarville core
53.8886	3.0025	Cedarville core
55.0774	2.89202	Cedarville core
56.2051	2.99555	Cedarville core
57.1195	3.03728	Cedarville core
57.912	2.79185	Cedarville core
59.1617	2.99853	Cedarville core
60.3504	3.05119	Cedarville core
61.3867	3.07603	Cedarville core
62.3011	2.92103	Cedarville core
63.3374	1.97211	Cedarville core
64.1909	1.85784	Cedarville core
64.9224	1.81611	Cedarville core
66.1416	2.0527	Cedarville core
67.056	1.81828	Cedarville core
67.5742	1.91463	Cedarville core
68.1838	1.46964	Cedarville core
68.7934	1.46666	Cedarville core
69.403	1.53391	Cedarville core
70.3783	1.11858	Cedarville core
71.1403	0.979467	Cedarville core
71.7499	0.973506	Cedarville core
72.8472	0.805582	Cedarville core
74.0664	0.98841	Cedarville core
74.9808	1.23682	Cedarville core
76.4134	1.50907	Cedarville core
